# Supplementary material for: Ceruloplasmin Interferes with the Assessment of Blood Lipid Hydroperoxide Content in Small Ruminants
Source: MDPI journal article supplement (doi:10.3390/antiox12030701), 2023-03-12
Supplement: s1 [file s1]

## Supplemental Materials

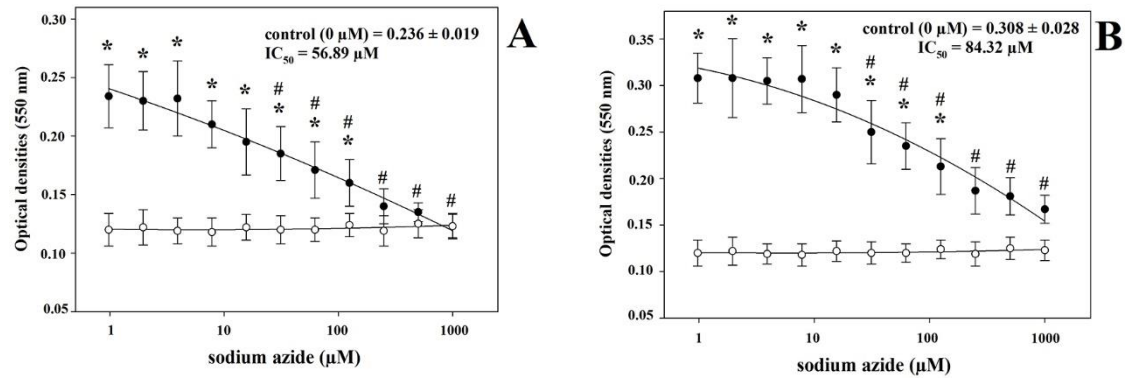

**Figure S1.** Dose-dependent effect of sodium azide treatment in adult goat (A) and sheep (B) blood serum samples, as assessed using a ROMs assay (filled circles). Blank abs: optical densities of blank wells treated with the same sodium azide concentration as the blood serum samples (empty circles). Mean values with the superscript # and \* show statistically significant differences in comparison with the lowest (0  $\mu\text{M}$ ) and the highest (1000  $\mu\text{M}$ ) sodium azide concentrations, respectively.
